# Supplementary material
Source: PubMed Central journal article supplement (PMC2579340)

Appendix

***In Vivo* Supramolecular Templating Enhances the Activity of Multivalent Ligands:  
A potential therapeutic against the E. coli O157 AB<sub>5</sub> toxins**

*Pavel I. Kitov,<sup>1</sup> George L. Mulvey,<sup>2</sup> Thomas P. Griener,<sup>2</sup> Tomasz Lipinski,<sup>1</sup> Dmitry Solomon,<sup>1</sup> Eugenia Paszkiewicz,<sup>1</sup> Jared M. Jacobson,<sup>1</sup> Joanna M. Sadowska,<sup>1</sup> Missao Suzuki,<sup>3</sup> Ken-ichi Yamamura<sup>3</sup>, Glen D. Armstrong,<sup>2</sup> and David R. Bundle<sup>1</sup>*

date: Oct 15 2007 sweep width: 7201Hz acq.time: 5.0s relax.time: 0.1s # scans: 16 dig.res.: 0.1 Hz/pt hz/mm:14.7  
spectrometer:d601 file:/mnt/d600/home8/drbrmr/rmrdata/AN/N1.fid

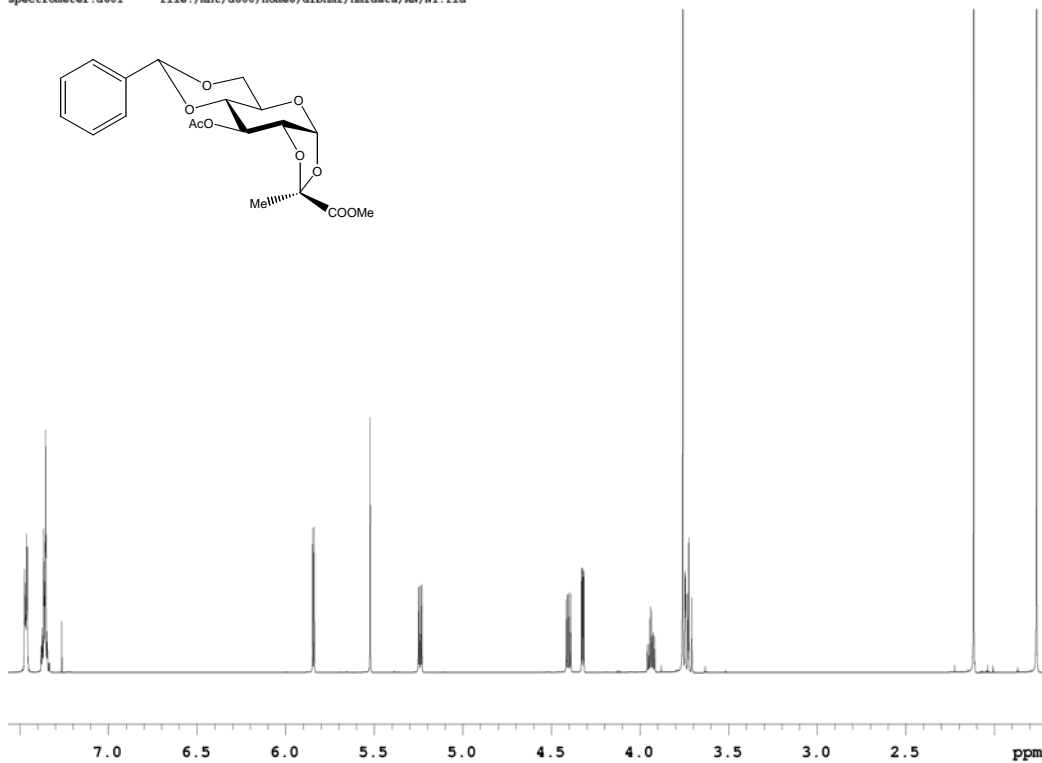

C & CH2 same, CH & CH3 opposite side of solvent signal  
date: Oct 12 2007 sweep width: 33784Hz acq.time: 2.0s relax.time: 0.1s # scans: 1072 dig.res.: 0.5 Hz/pt hz/mm:80.1  
spectrometer:d601 file:/mnt/d600/home8/drbrmr/rmrdata/AN/N1APT.fid

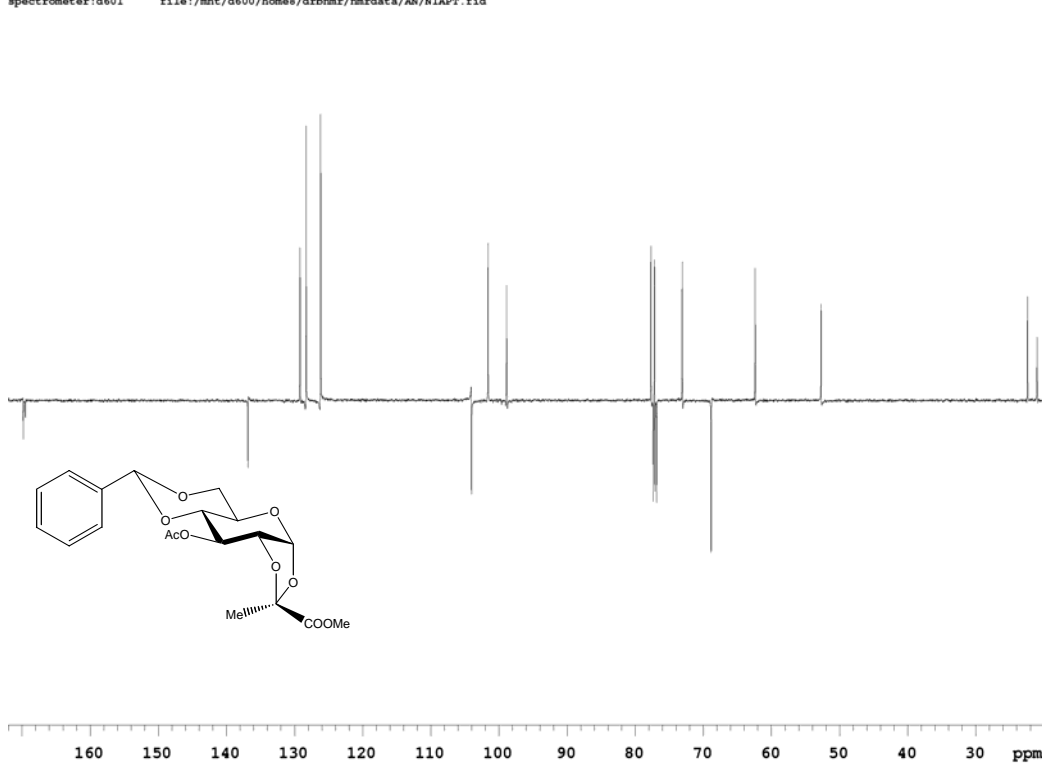

date: Oct 10 2007 sweep width: 6010Hz acq.time: 5.0s relax.time: 0.1s # scans: 16 dig.res.: 0.1 Hz/pt hz/mm:12.1  
spectrometer:d601 file:/mnt/d600/home8/drbrmr/rmrdata/AN/N2.fid

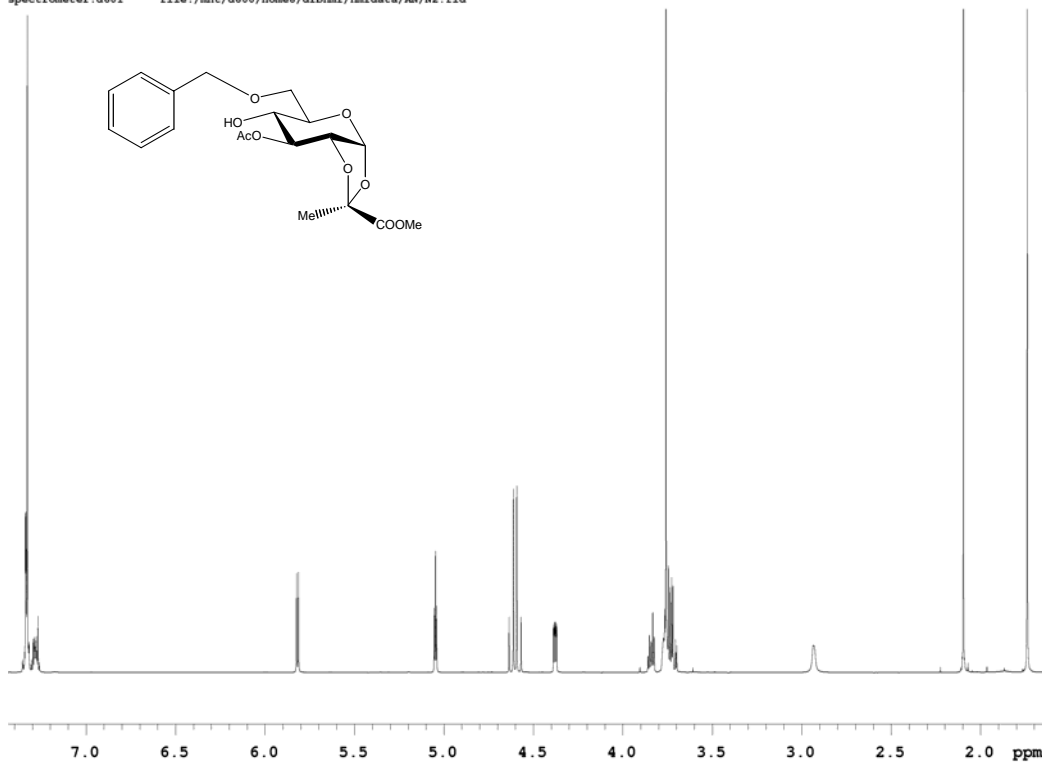

C & CH2 same, CH & CH3 opposite side of solvent signal  
date: Oct 17 2007 sweep width: 33827Hz acq.time: 2.0s relax.time: 0.1s # scans: 1160 dig.res.: 0.5 Hz/pt hz/mm:81.1  
spectrometer:d601 file:/mnt/d600/home8/drbrmr/rmrdata/AN/N2APT.fid

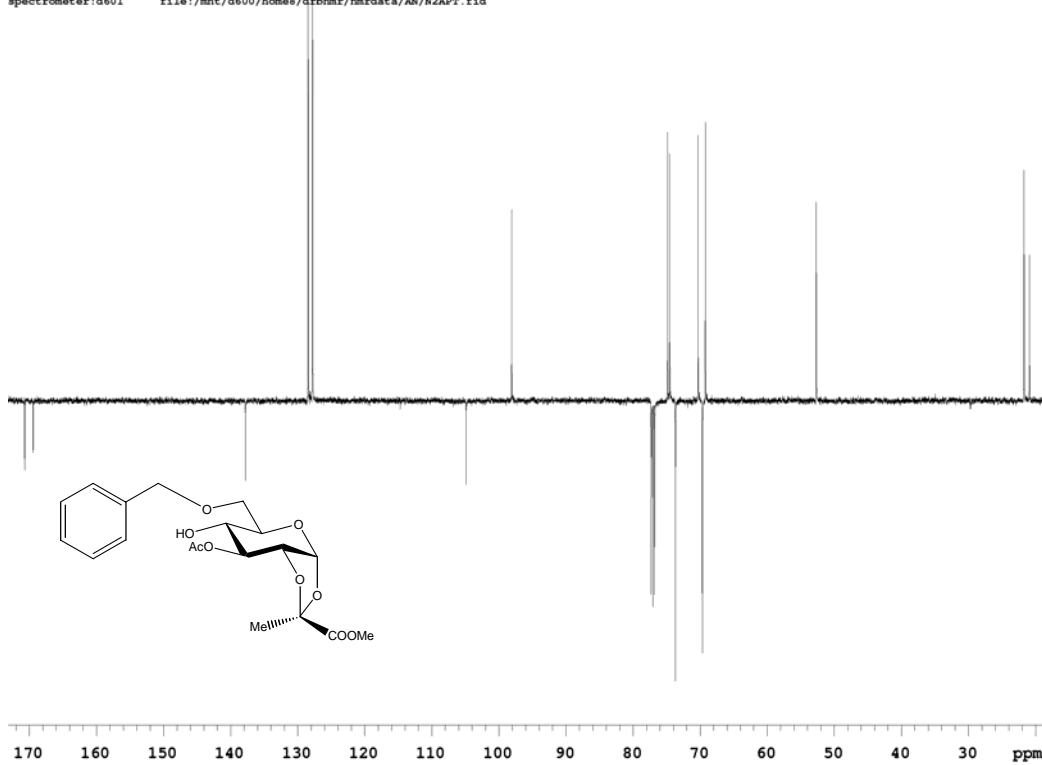

date: Oct 15 2007 sweep width: 7201Hz acq.time: 5.0s relax.time: 0.1s # scans: 16 dig.res.: 0.1 Hz/pt hz/mm:15.1  
spectrometer:d601 file:/mnt/d600/home8/drbrmr/rmrdata/AN/N3.fid

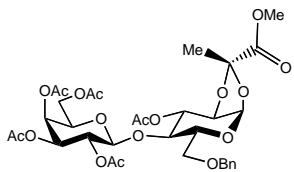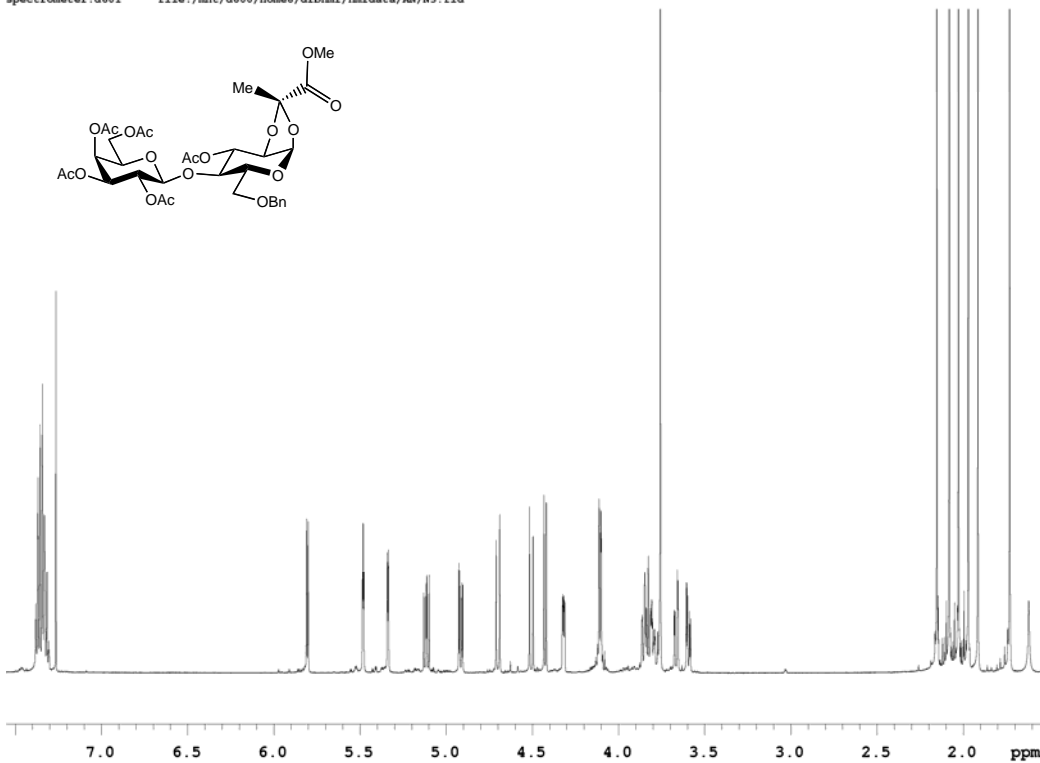

C & CH2 same, CH & CH3 opposite side of solvent signal  
date: Sep 18 2007 sweep width: 33784Hz acq.time: 2.0s relax.time: 0.1s # scans: 27592 dig.res.: 0.5 Hz/pt hz/mm:82.1  
spectrometer:d601 file:/mnt/d600/home8/drbrmr/rmrdata/AN/N3APT.fid

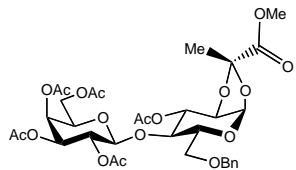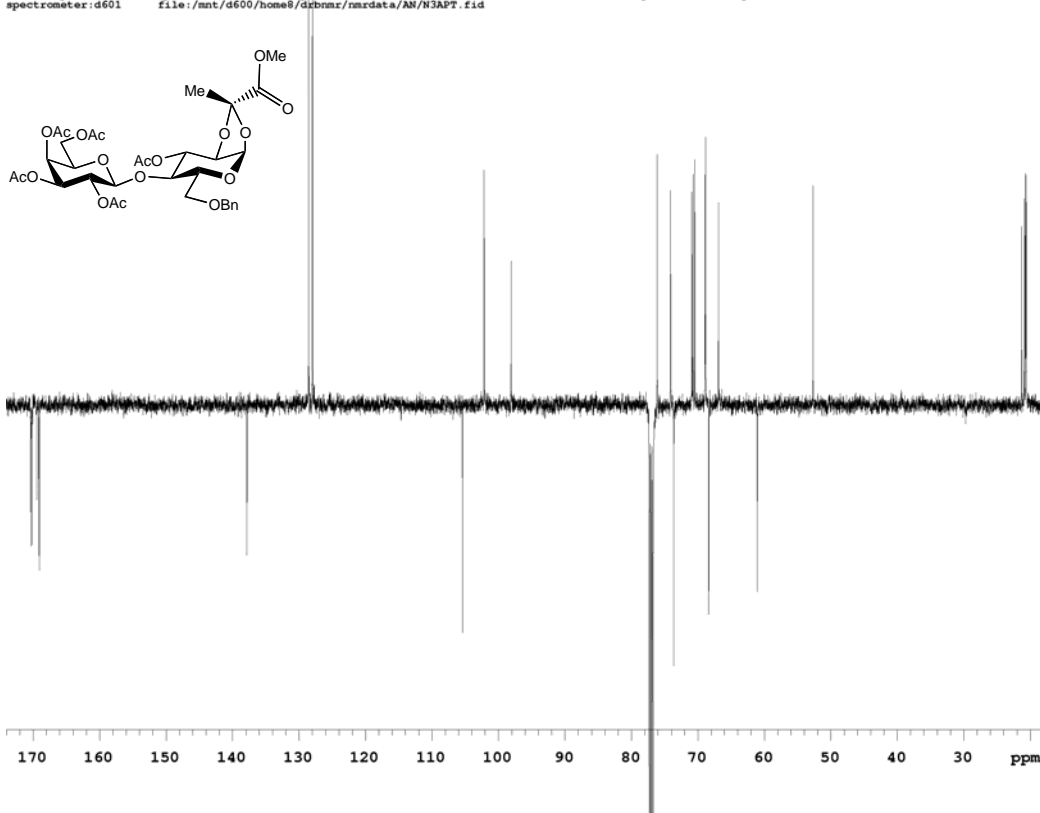

date: Oct 15 2007 sweep width: 7201Hz acq.time: 5.0s relax.time: 0.1s # scans: 16 dig.res.: 0.1 Hz/pt hz/mm:10.5  
spectrometer:d601 file:/mnt/d600/home8/drbnmr/nmrdata/AN/N4.fid

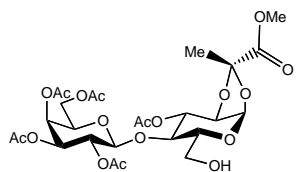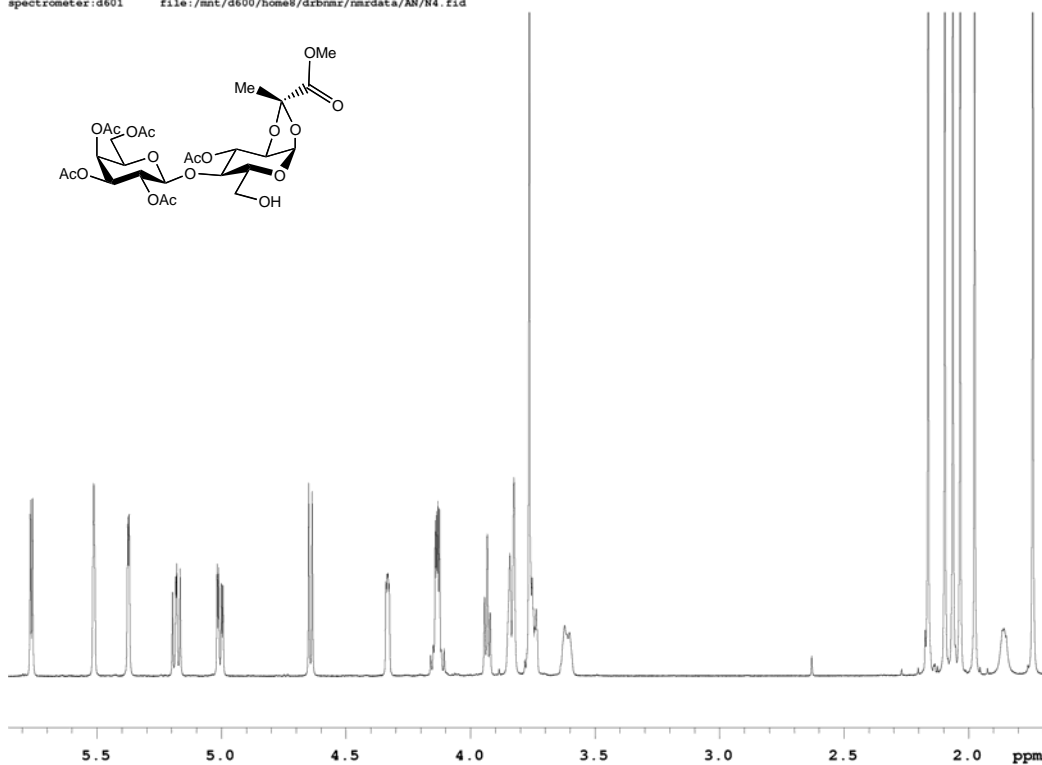

C & CH2 same, CH & CH3 opposite side of solvent signal  
date: Sep 16 2007 sweep width: 33784Hz acq.time: 2.0s relax.time: 0.1s # scans: 608 dig.res.: 0.5 Hz/pt hz/mm:85.5  
spectrometer:d601 file:/mnt/d600/home8/drbnmr/nmrdata/AN/N4APT.fid

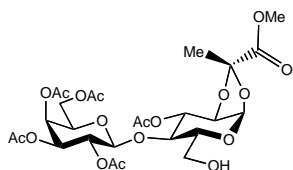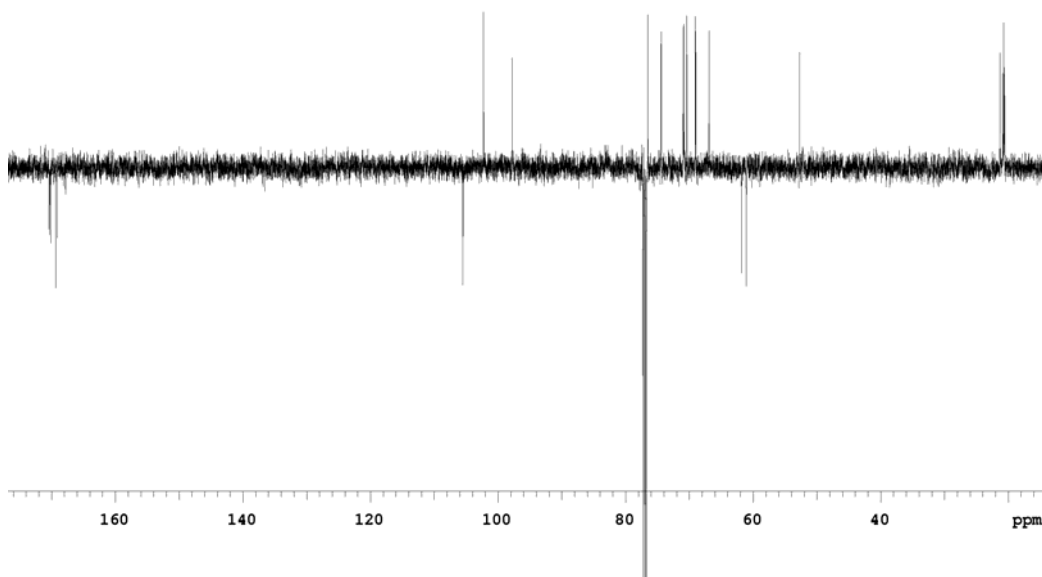

date: Sep 21 2007 sweep width: 6010Hz acq.time: 5.0s relax.time: 0.1s # scans: 16 dig.res.: 0.1 Hz/pt hz/mm:14.6  
spectrometer:d601 file:/mnt/d600/home8/drbrmr/rmrdata/AN/N5.fid

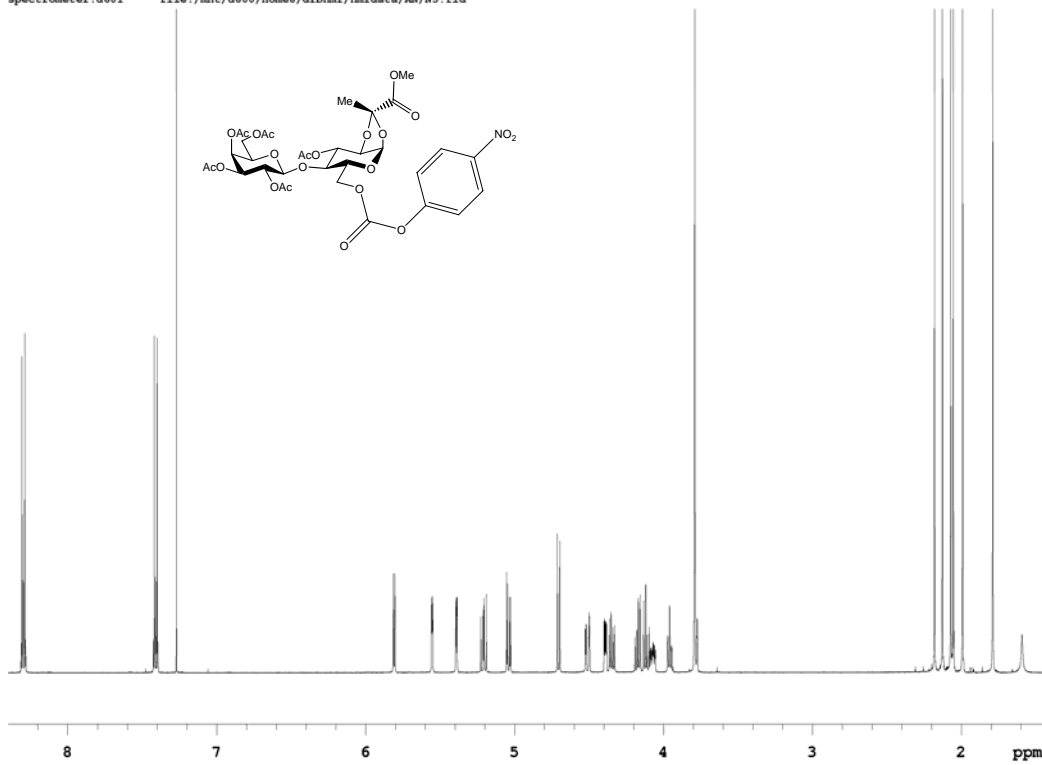

C & CH2 same, CH & CH3 opposite side of solvent signal  
date: Sep 21 2007 sweep width: 33784Hz acq.time: 2.0s relax.time: 0.1s # scans: 200 dig.res.: 0.5 Hz/pt hz/mm:88.8  
spectrometer:d601 file:/mnt/d600/home8/drbrmr/rmrdata/AN/N5APT.fid

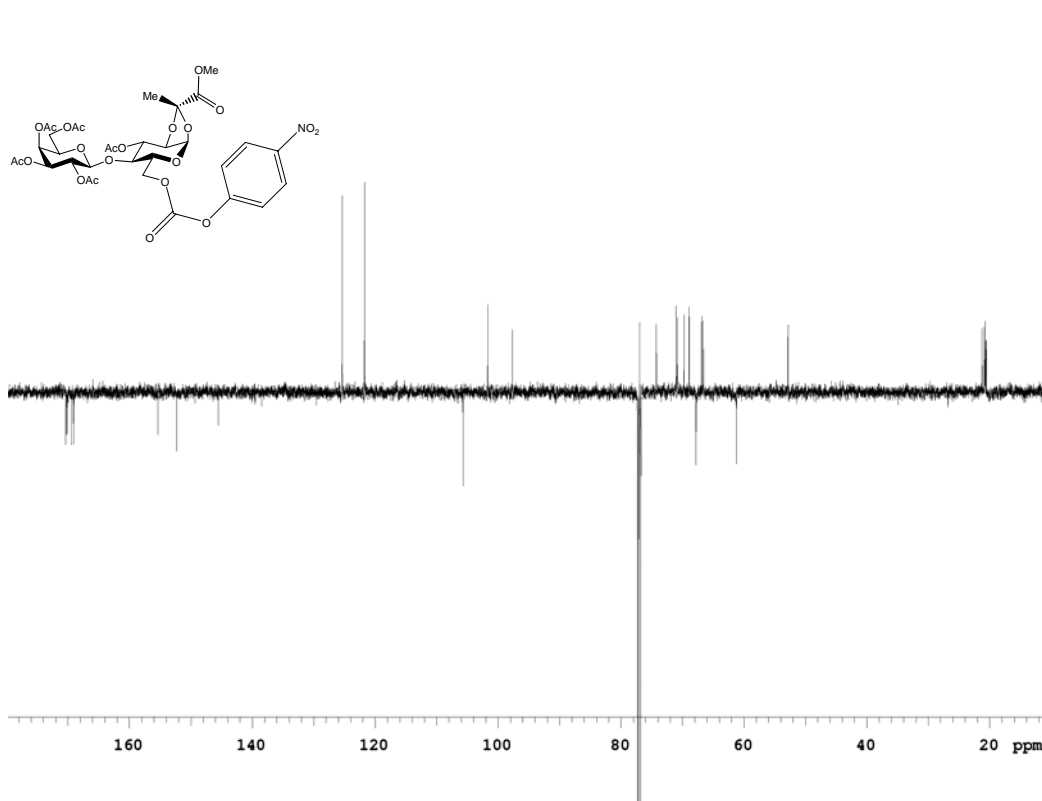

date: Aug 3 2007 sweep width: 4802Hz acq.time: 5.0s relax.time: 0.1s # scans: 16 dig.res.: 0.1 Hz/pt hz/mm:9.1  
spectrometer:d601 file:/mnt/d600/home8/drbrmr/rmrdata/AN/N6.fid

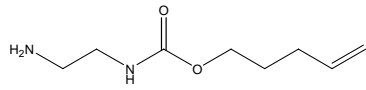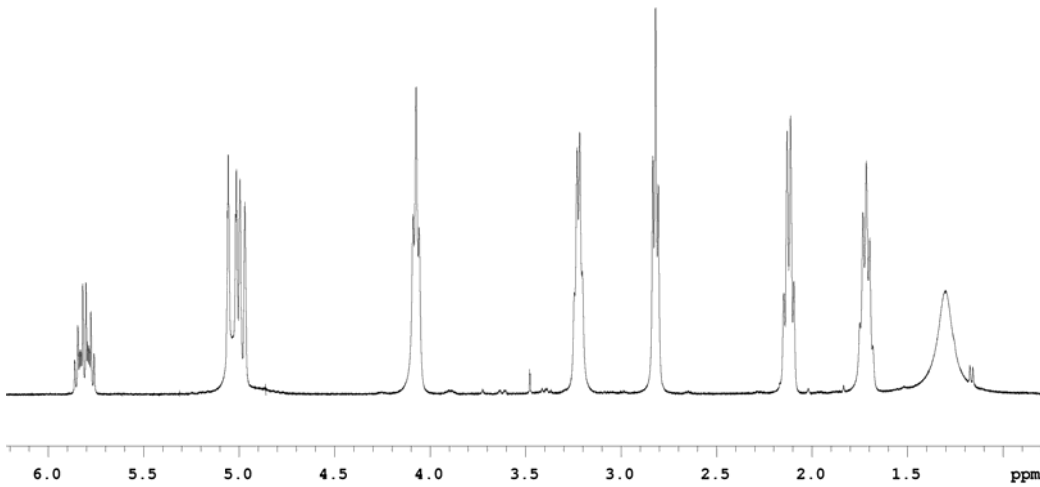

C & CH2 same, CH & CH3 opposite side of solvent signal  
date: Sep 27 2007 sweep width: 33784Hz acq.time: 2.0s relax.time: 0.1s # scans: 240 dig.res.: 0.5 Hz/pt hz/mm:75.3  
spectrometer:d601 file:/mnt/d600/home8/drbrmr/rmrdata/AN/N6APT.fid

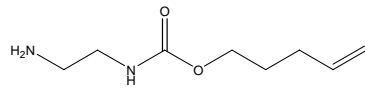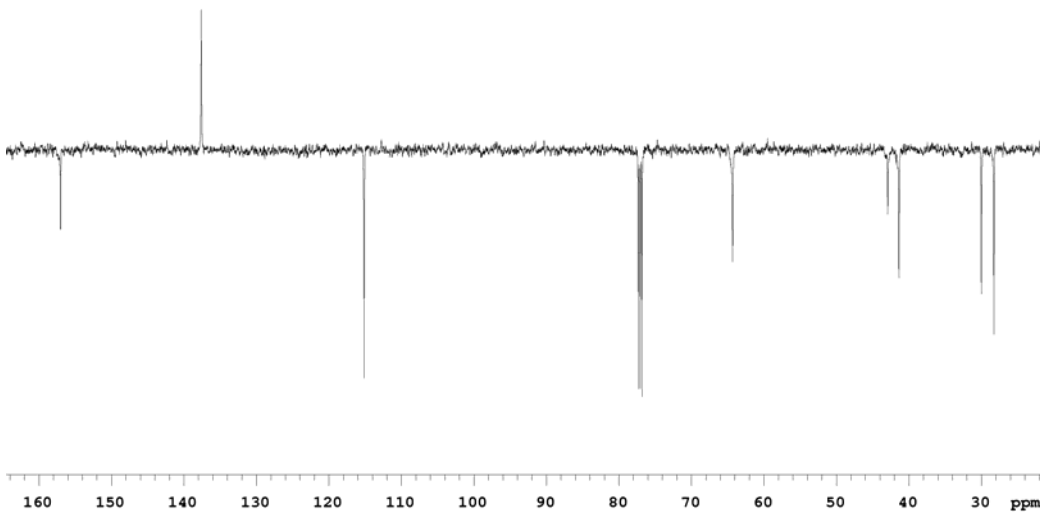

date: Jul 4 2007 sweep width: 7201Hz acq.time: 5.0s relax.time: 0.1s # scans: 16 dig.res.: 0.1 Hz/pt hz/mm:10.8  
spectrometer:d601 file:/mnt/d600/home8/drbrmr/rmrdata/AN/N7.fid

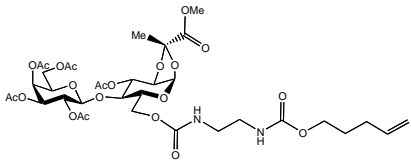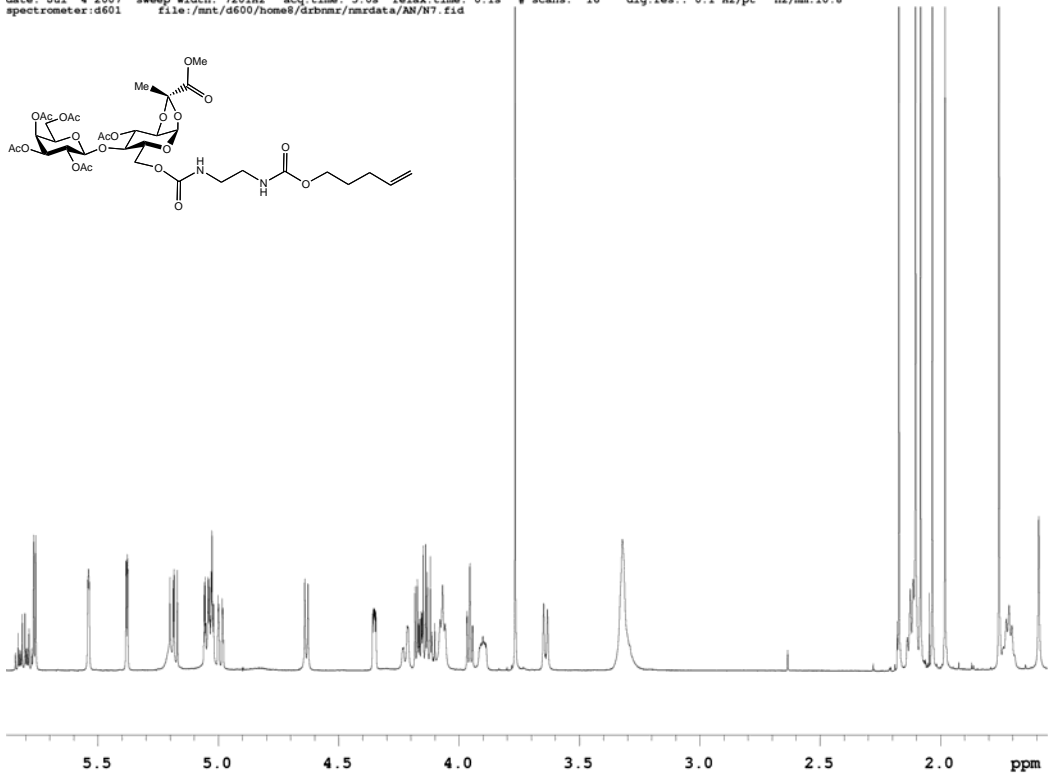

C & CH2 same, CH & CH3 opposite side of solvent signal  
date: Sep 21 2007 sweep width: 33784Hz acq.time: 2.0s relax.time: 0.1s # scans: 2752 dig.res.: 0.5 Hz/pt hz/mm:82.0  
spectrometer:d601 file:/mnt/d600/home8/drbrmr/rmrdata/AN/N7APT.fid

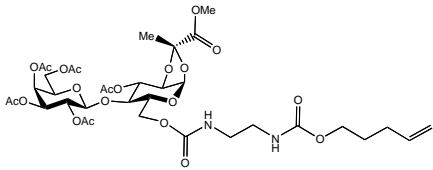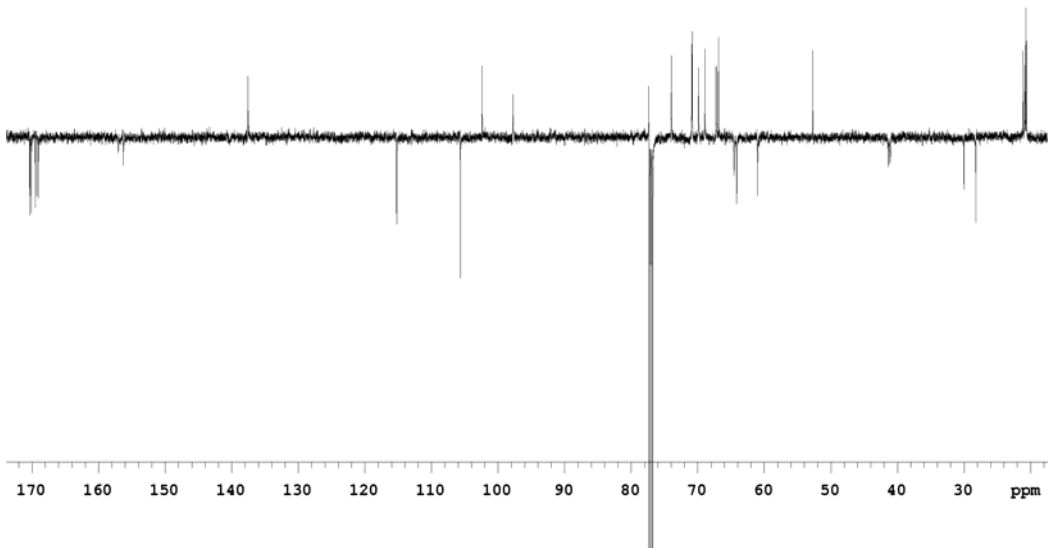



date: Oct 24 2007 sweep width: 7201Hz acq.time: 3.0s relax.time: 2.0s # scans: 16 dig.res.: 0.1 Hz/pt hz/mm:11.4  
spectrometer:d601 file:/mnt/d600/home8/drbrmr/nmrdata/AN/N8.fid

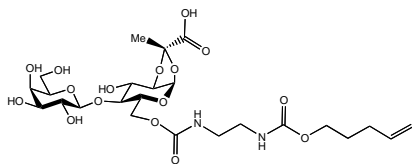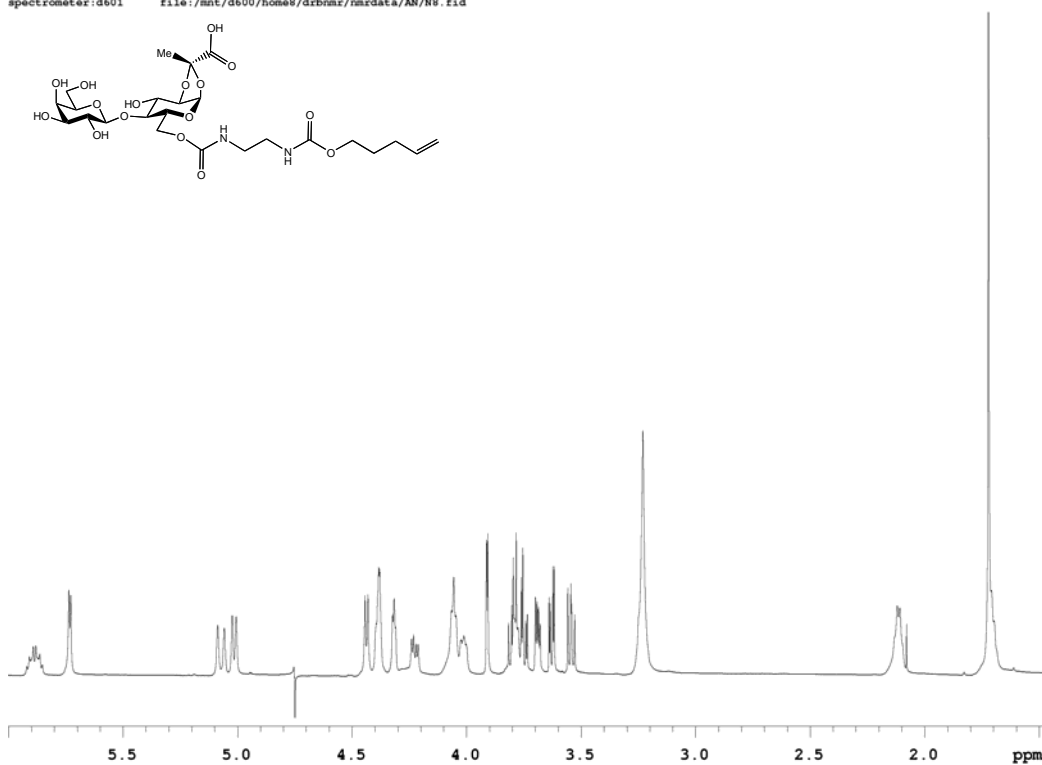

C & CH2 opposite side of CH & CH3  
date: Oct 24 2007 sweep width: 33784Hz acq.time: 2.0s relax.time: 0.1s # scans: 0 dig.res.: 0.5 Hz/pt hz/mm:86.6  
spectrometer:d601 file:/mnt/d600/home8/drbrmr/nmrdata/AN/N8AcidicAPT.fid

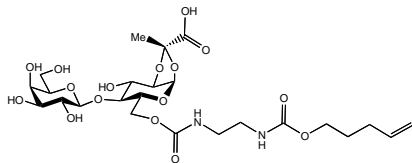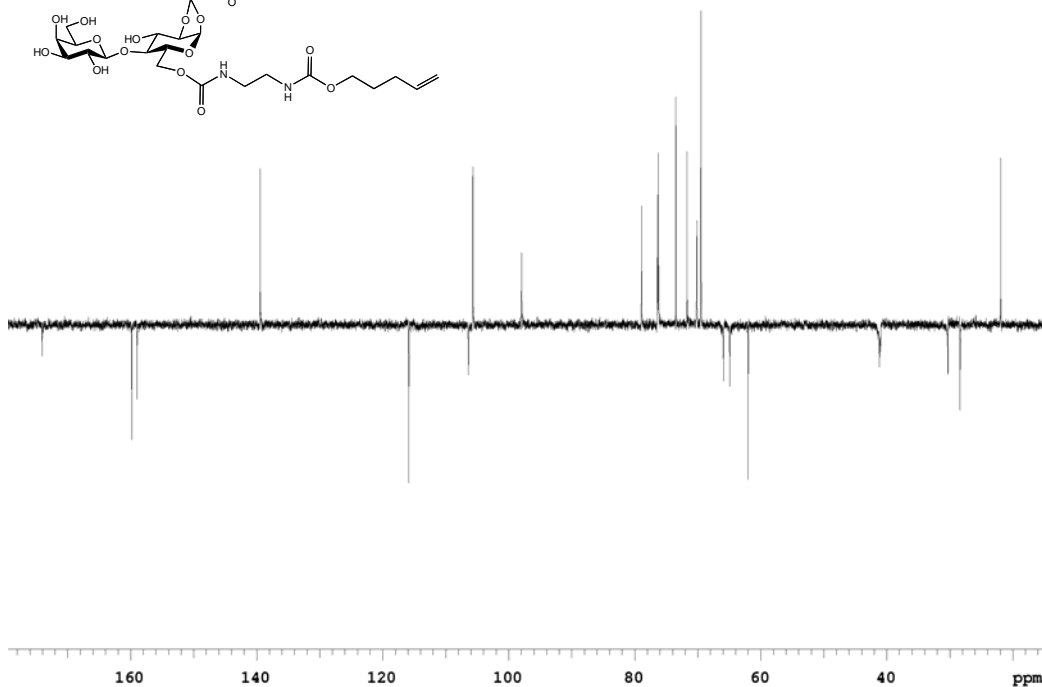

date: Sep 20 2007 sweep width: 7201Hz acq.time: 3.0s relax.time: 2.0s # scans: 16 dig.res.: 0.1 Hz/pt hz/mm:11.1  
spectrometer:d601 file:/mnt/d600/home8/dzbrmr/rmrdata/AN/N9.fid

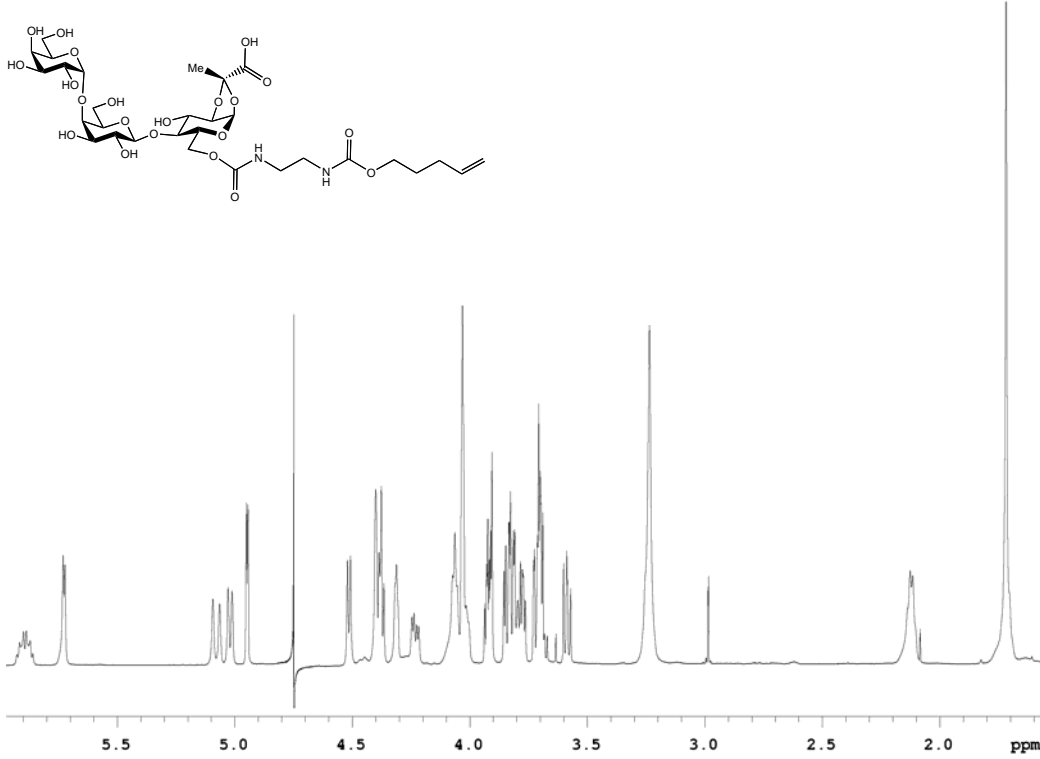

C 4 CH2 opposite side of CH 4 CH3  
date: Sep 21 2007 sweep width: 33784Hz acq.time: 2.0s relax.time: 0.1s # scans: 26104 dig.res.: 0.5 Hz/pt hz/mm:84.5  
spectrometer:d601 file:/mnt/d600/home8/dzbrmr/rmrdata/AN/N9AP7.fid

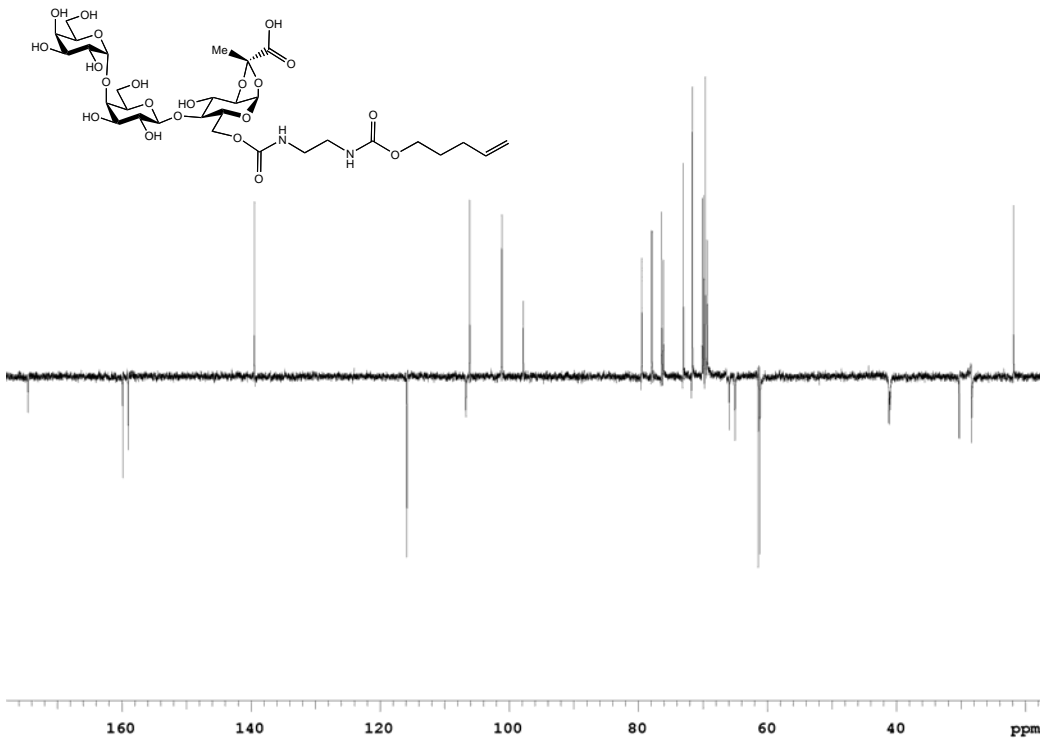

600 MHz 1D in CDCl3 (ref. to CDCl3 @ 7.26 ppm), temp 28.0 C -> actual temp = 27.0 C, id600 probe  
date: Aug 8 2007 sweep width: 7201Hz acq.time: 5.0s relax.time: 0.1s # scans: 16 dig.res.: 0.1 Hz/pt hz/mm:10.8  
spectrometer:d601 file:/mnt/d600/home8/drbrmr/rmrdata/AN/N10.fid

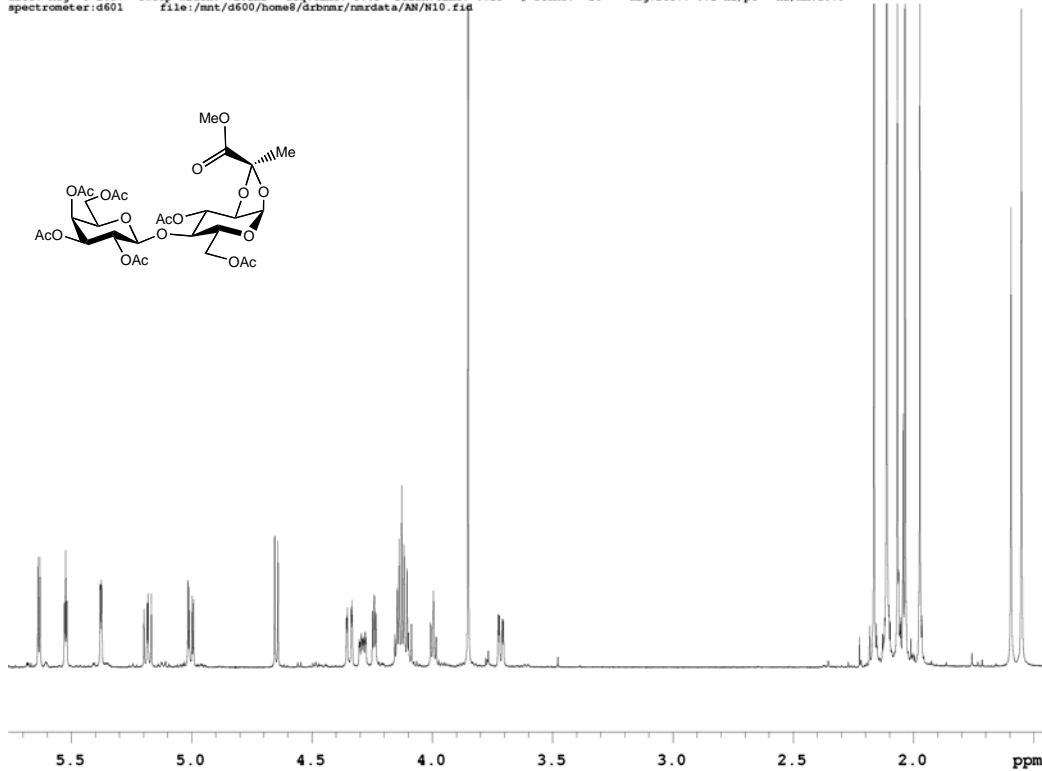

C & CH2 same, CH & CH3 opposite side of solvent signal  
date: Sep 7 2007 sweep width: 33784Hz acq.time: 2.0s relax.time: 0.1s # scans: 1576 dig.res.: 0.5 Hz/pt hz/mm:87.1  
spectrometer:d601 file:/mnt/d600/home8/drbrmr/rmrdata/AN/N10APT.fid

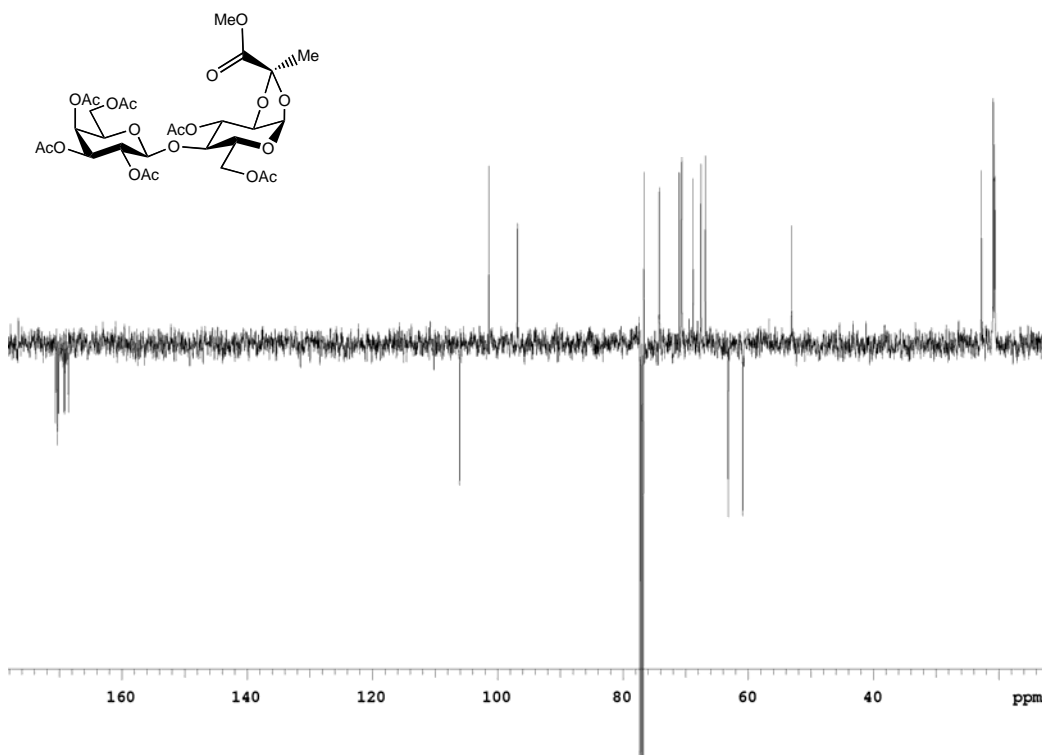

600 MHz 1D in D2O (ref. to 0.1 % ext. acetone @ 2.225 ppm), temp 28.0 C -> actual temp = 27.0 C, id600 probe  
date: Aug 10 2007 sweep width: 7201Hz acq.time: 3.0s relax.time: 2.0s # scans: 16 dig.res.: 0.1 Hz/pt hz/mm:11.1  
spectrometer:d601 file:/mnt/d600/home8/drbrmr/rmrdata/AN/N11.fid

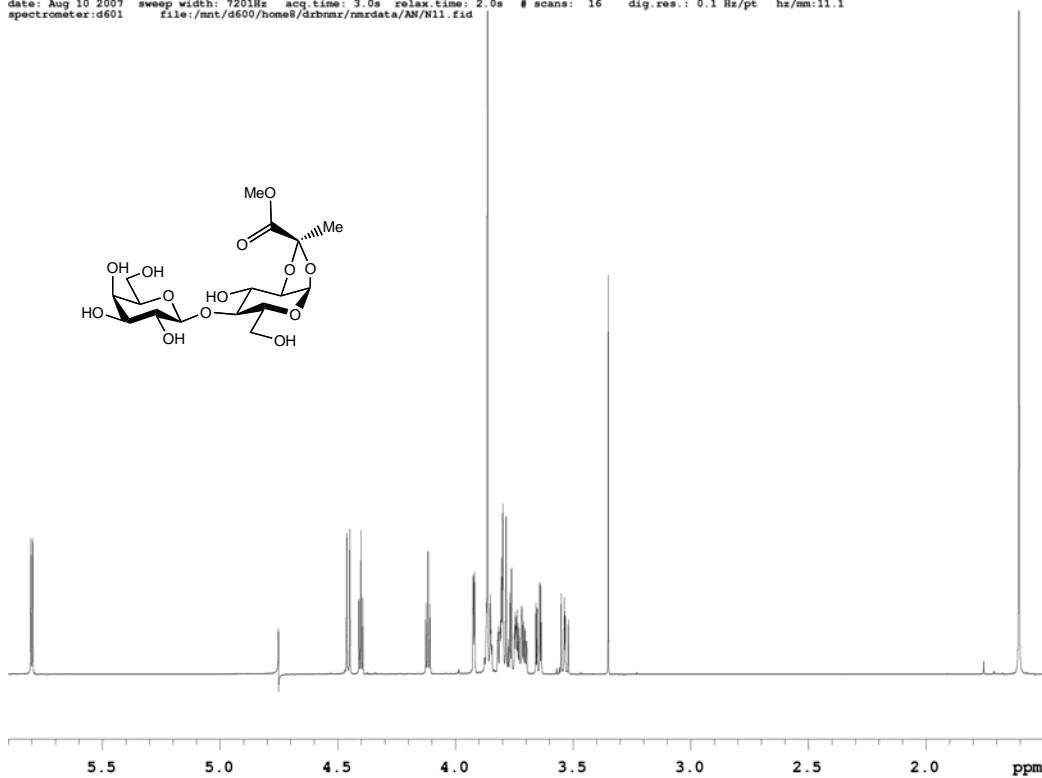

C & CH2 opposite side of CH & CH3  
date: Oct 17 2007 sweep width: 33827Hz acq.time: 2.0s relax.time: 0.1s # scans: 2192 dig.res.: 0.5 Hz/pt hz/mm:80.2  
spectrometer:d601 file:/mnt/d600/home8/drbrmr/rmrdata/AN/N11APT.fid

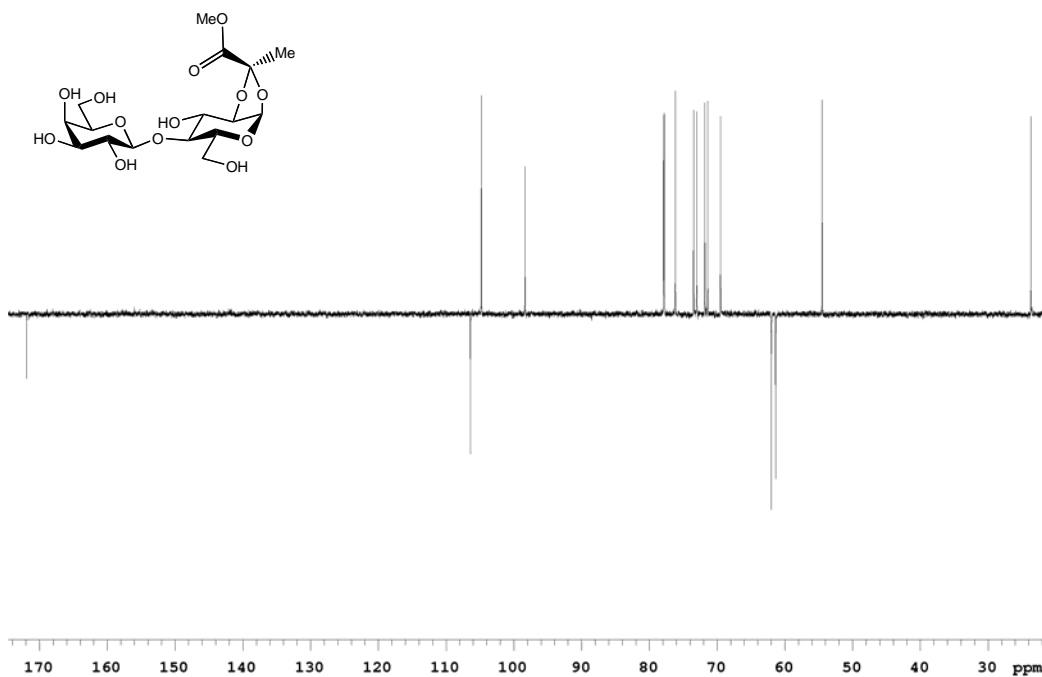

600 MHz 1D in CDCl3 (ref. to CDCl3 @ 7.26 ppm), temp 28.0 C -> actual temp = 27.0 C, id600 probe  
date: Aug 13 2007 sweep width: 7201Hz acq.time: 5.0s relax.time: 0.1s # scans: 16 dig.res.: 0.1 Hz/pt hz/mm:15.5  
spectrometer:d601 file:/mnt/d600/home8/drbrmr/rmrdata/AN/N12.fid

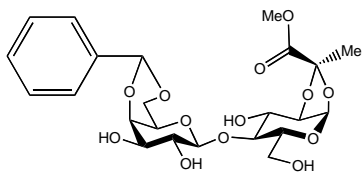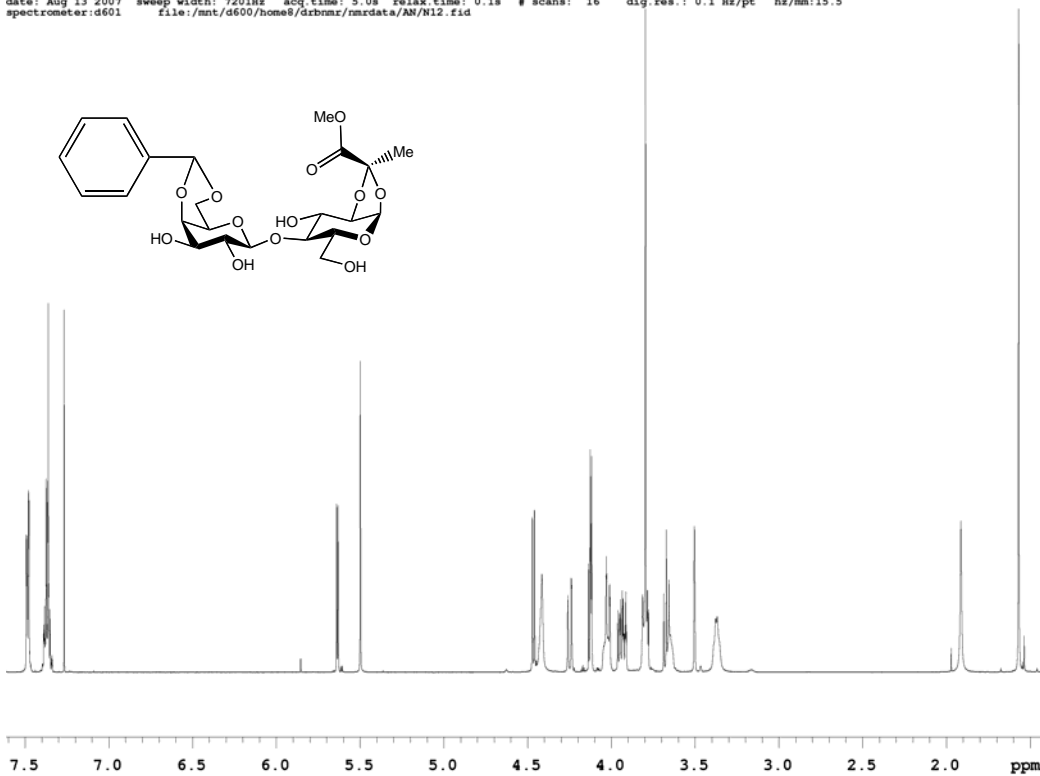

C & CH2 same, CH & CH3 opposite side of solvent signal  
date: Aug 13 2007 sweep width: 33784Hz acq.time: 2.0s relax.time: 0.1s # scans: 888 dig.res.: 0.5 Hz/pt hz/mm:81.0  
spectrometer:d601 file:/mnt/d600/home8/drbrmr/rmrdata/AN/N12APT.fid

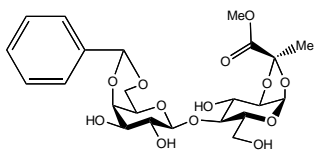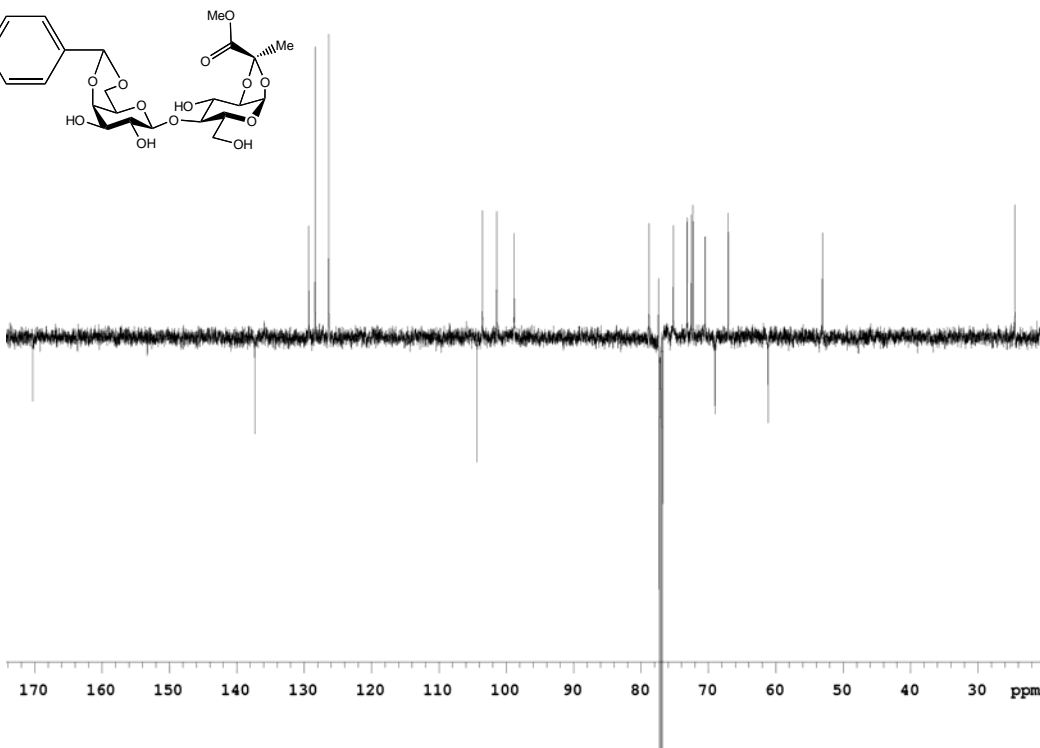

date: Aug 16 2007 sweep width: 6010Hz acq.time: 5.0s relax.time: 0.1s # scans: 16 dig.res.: 0.1 Hz/pt hz/mm:14.5  
spectrometer:d601 file:/mnt/d600/home8/grbnmr/rmrdata/AN/N13.fid

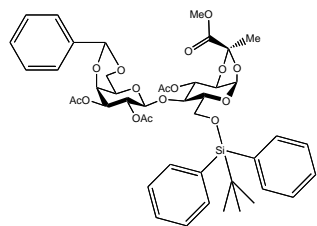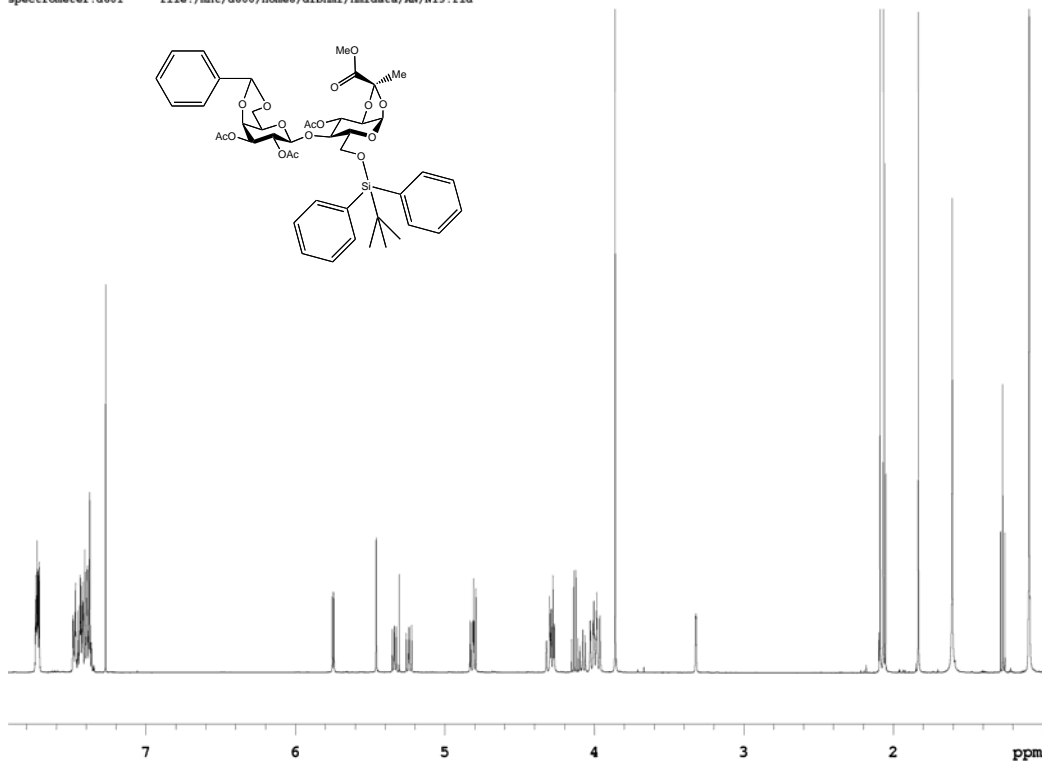

-----  
C 4 CH2 same, CH 4 CH3 opposite side of solvent signal  
date: Dec 14 2007 sweep width: 33784Hz acq.time: 2.0s relax.time: 0.1s # scans: 3360 dig.res.: 0.5 Hz/pt hz/mm:81.0  
spectrometer:d601 file:/mnt/d600/home8/grbnmr/rmrdata/AN/2007.12.14.u5\_N13-APT\_C13\_apt.fid

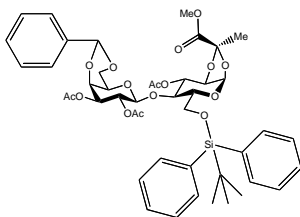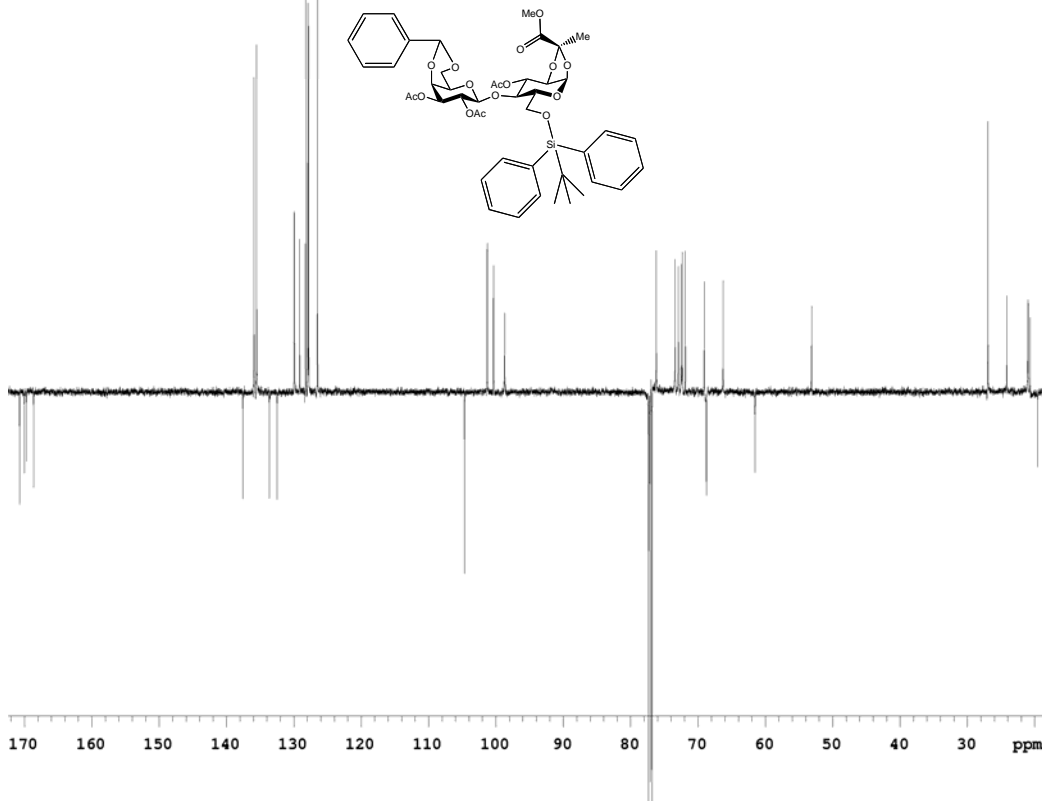

date: Aug 17 2007 sweep width: 6010Hz acq.time: 5.0s relax.time: 0.1s # scans: 16 dig.res.: 0.1 Hz/pt hz/mm:12.7  
spectrometer:d601 file:/mnt/d600/home8/drbrnr/rmrdata/AN/N14.fid

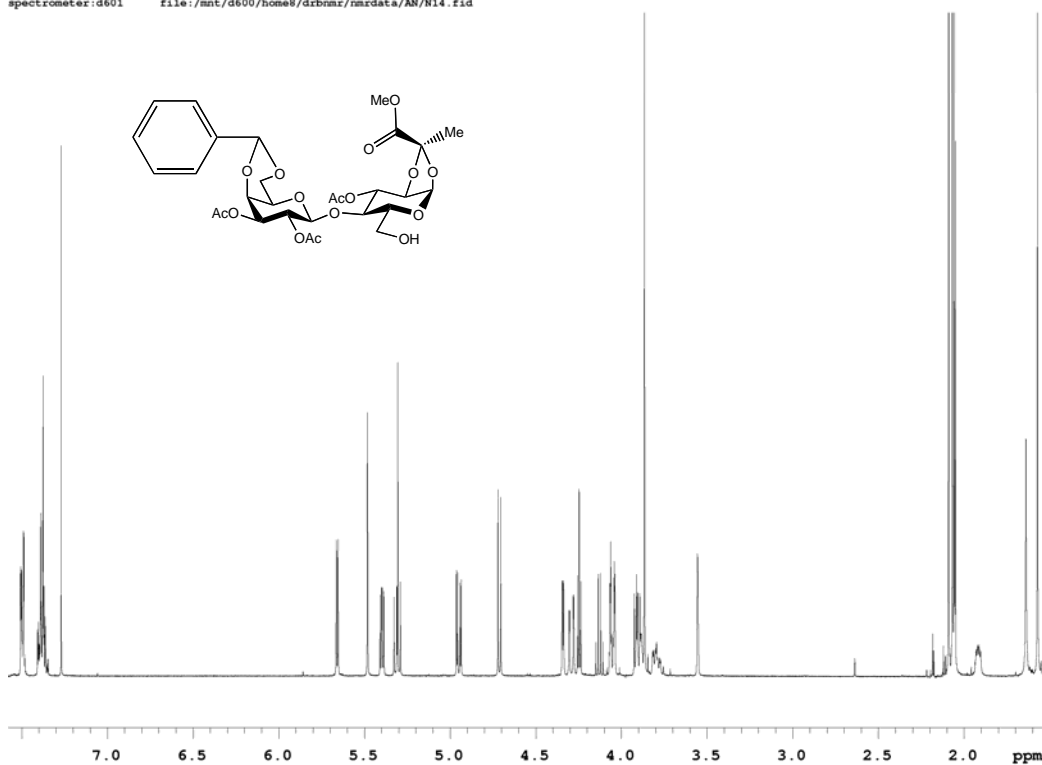

C & CH2 same, CH & CH3 opposite side of solvent signal  
date: Aug 17 2007 sweep width: 33784Hz acq.time: 2.0s relax.time: 0.1s # scans: 1624 dig.res.: 0.5 Hz/pt hz/mm:80.7  
spectrometer:d601 file:/mnt/d600/home8/drbrnr/rmrdata/AN/N14APT.fid

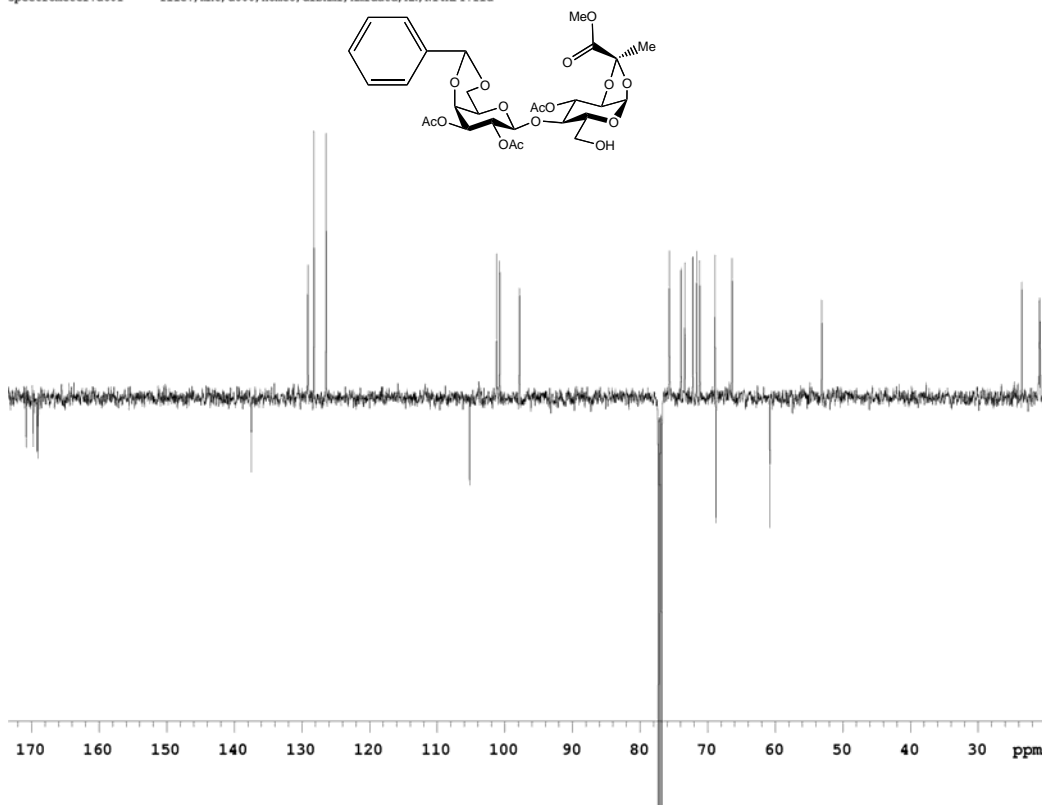

600 MHz 1D in CDCl<sub>3</sub> (ref. to CDCl<sub>3</sub> @ 7.26 ppm), temp 28.0 C -> actual temp = 27.0 C, id600 probe  
date: Aug 21 2007 sweep width: 72018Hz acq.time: 5.0s relax.time: 0.1s # scans: 16 dig.res.: 0.1 Hz/pt hz/mm:16.6  
spectrometer:d601 file:/mnt/d600/home8/drbrnr/rmrdata/AN/N15.fid

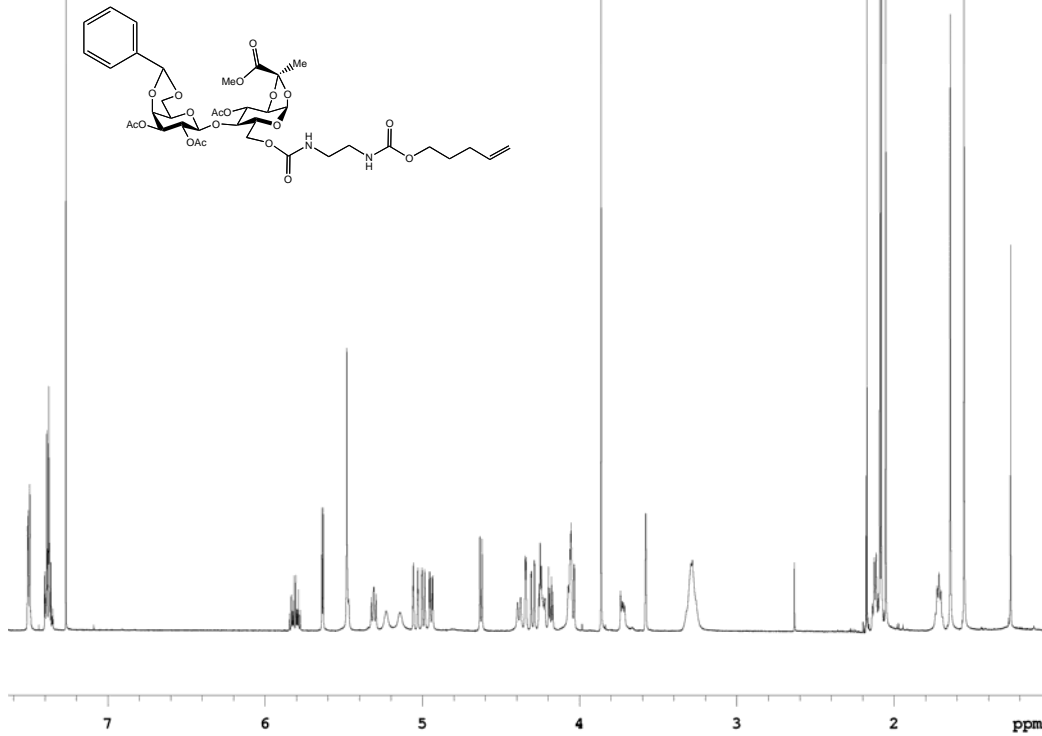

C 4 CH2 same, CH & CH3 opposite side of solvent signal  
date: Aug 22 2007 sweep width: 33784Hz acq.time: 2.0s relax.time: 0.1s # scans: 2024 dig.res.: 0.5 Hz/pt hz/mm:83.9  
spectrometer:d601 file:/mnt/d600/home8/drbrnr/rmrdata/AN/N15APT-bad.fid

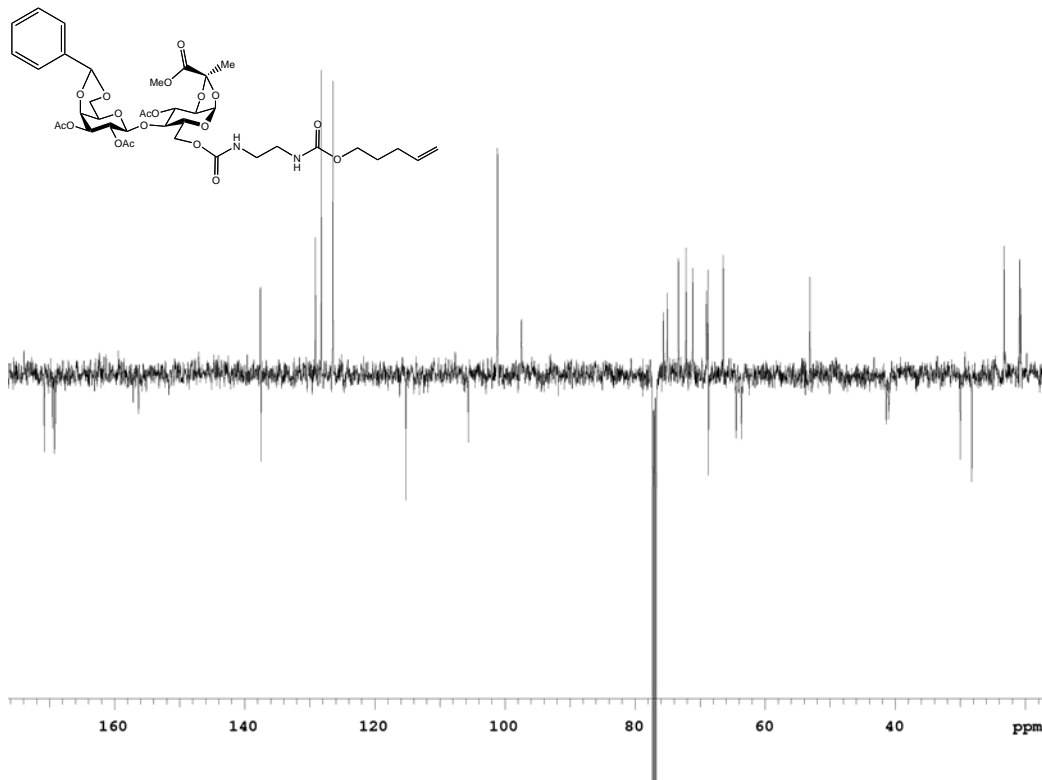



date: Oct 19 2007 sweep width: 6001Hz acq.time: 5.0s relax.time: 0.1s # scans: 16 dig.res.: 0.1 Hz/pt hz/mm: 9.3  
spectrometer: d601 file: /mnt/d600/home8/grbnmr/mrdata/AN/N-16-2.fid

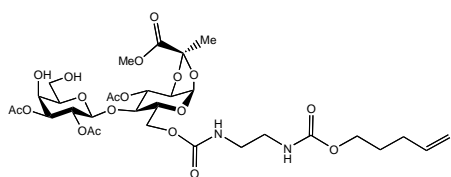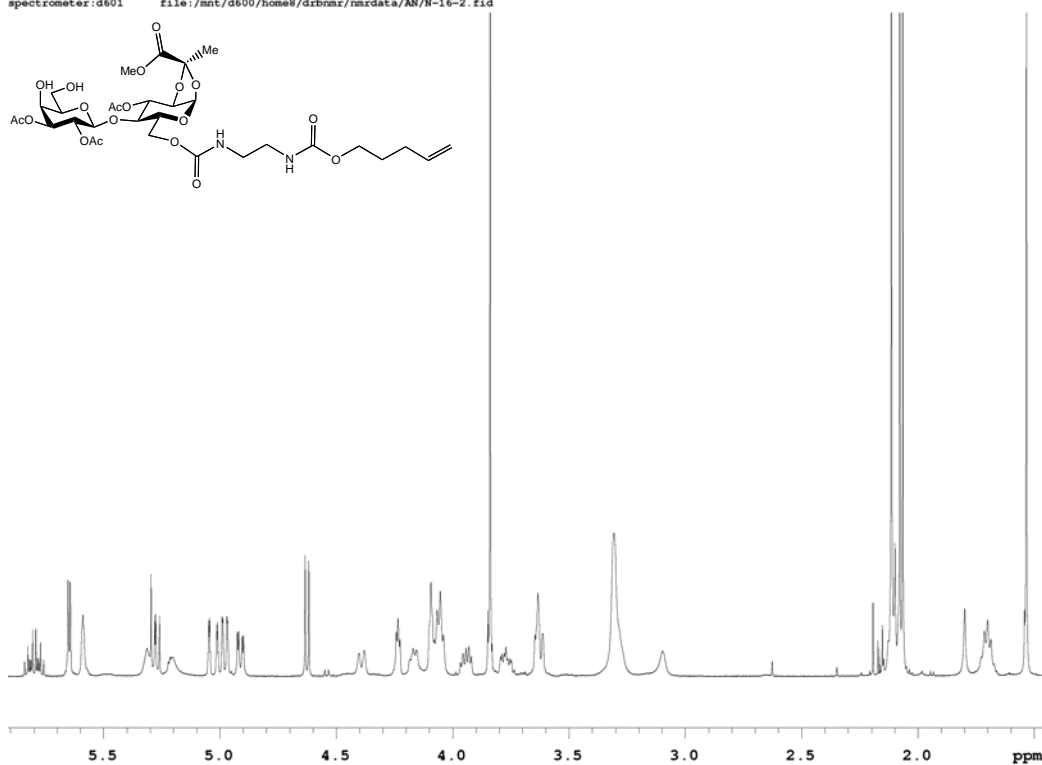

125 MHz APT in CDCl3 (ref. to CDCl3 @ 77.0 ppm), temp 26.1 C -> actual temp = 27.0 C, autotx probe  
date: Aug 22 2007 sweep width: 22384Hz acq.time: 1.0s relax.time: 0.1s # scans: 1536 dig.res.: 0.5 Hz/pt hz/mm: 85.0  
spectrometer: d601 file: /mnt/d600/home8/grbnmr/mrdata/AN/N16APT.fid

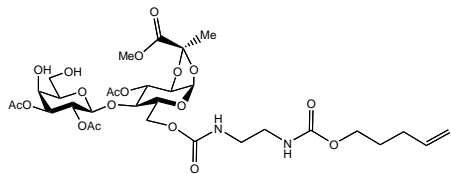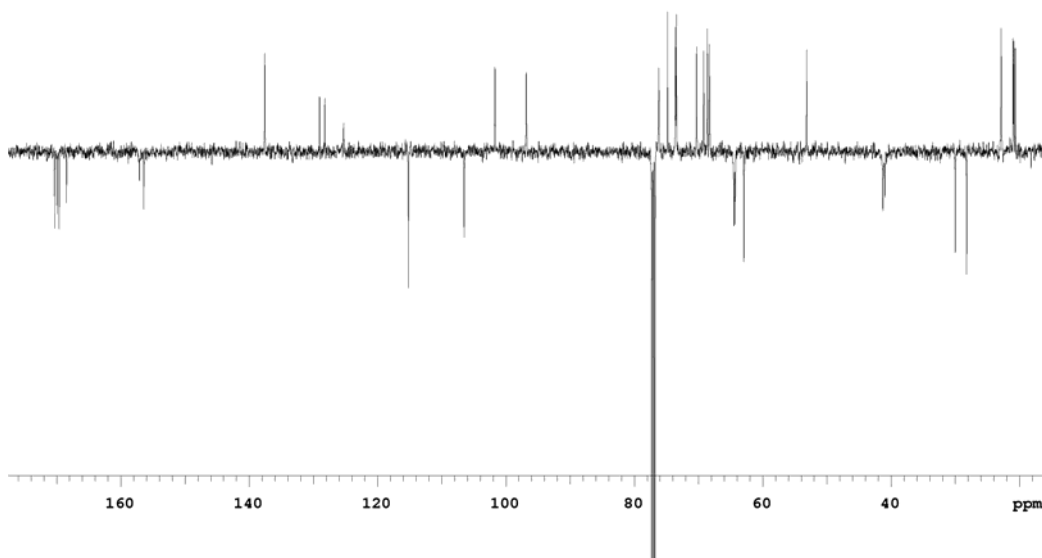

date: Aug 27 2007 sweep width: 7201Hz acq.time: 3.0s relax.time: 2.0s # scans: 16 dig.res.: 0.1 Hz/pt hz/mm:11.7  
spectrometer:d601 file:/mnt/d600/home8/drbrnr/rmrdata/AN/N17.fid

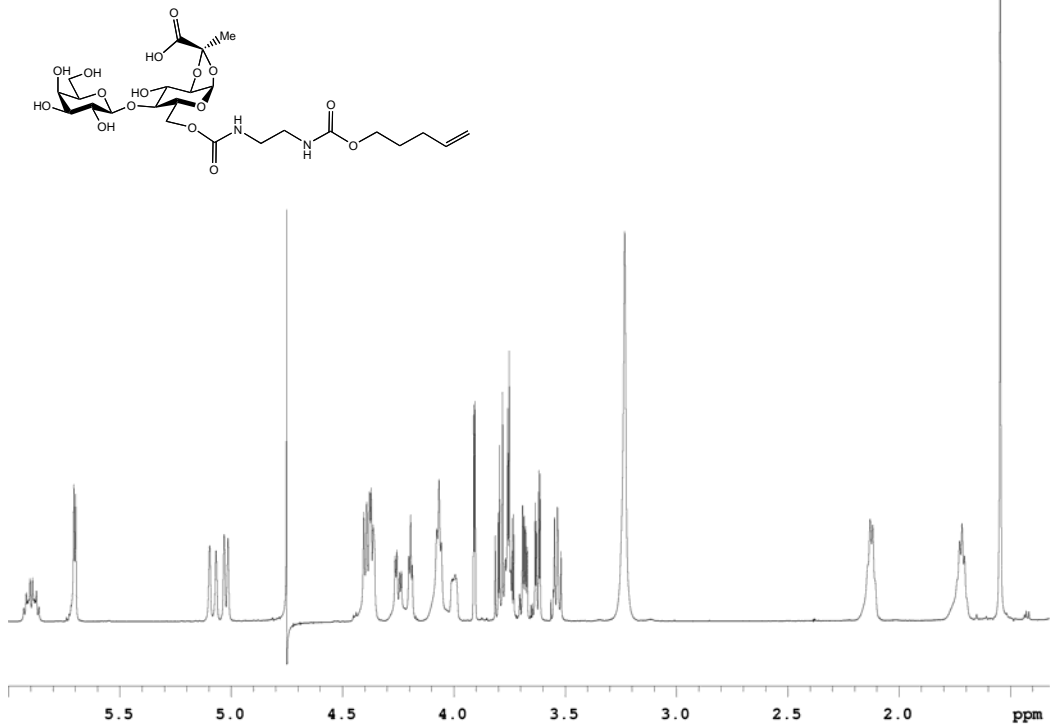

C & CH2 opposite side of CH & CH3  
date: Aug 27 2007 sweep width: 33827Hz acq.time: 2.0s relax.time: 0.1s # scans: 1360 dig.res.: 0.5 Hz/pt hz/mm:83.3  
spectrometer:d601 file:/mnt/d600/home8/drbrnr/rmrdata/AN/N17APT.fid

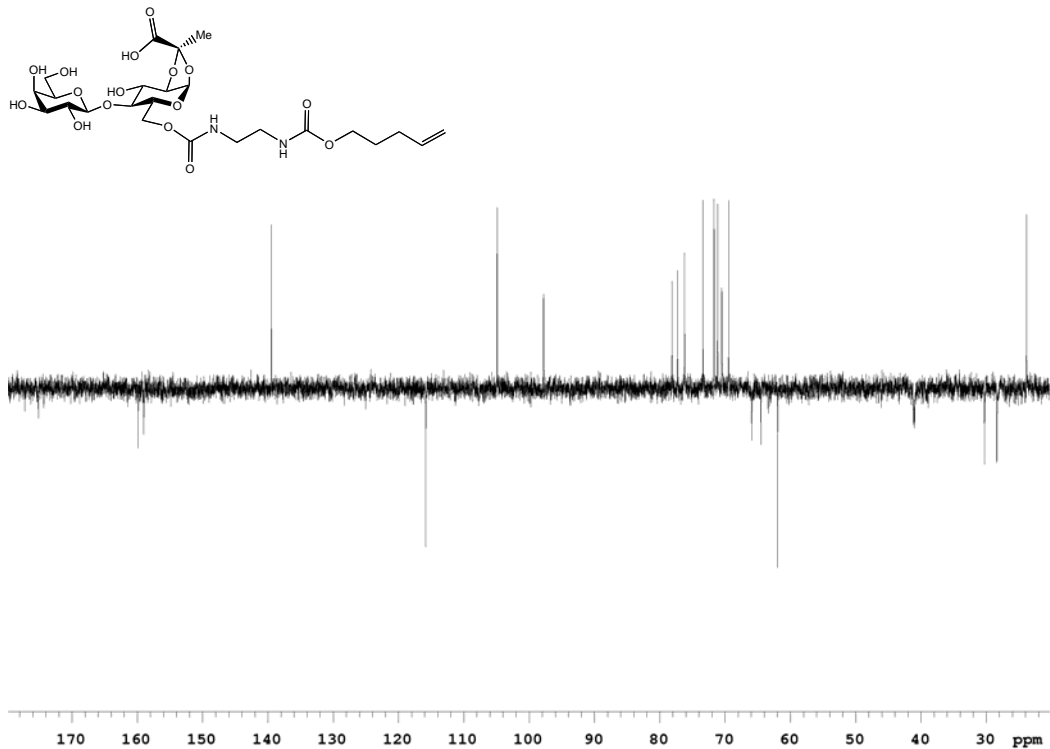

date: Oct 17 2007 sweep width: 7201Hz acq.time: 3.0s relax.time: 2.0s # scans: 16 dig.res.: 0.1 Hz/pt hz/mm:11.6  
spectrometer:d601 file:/mnt/d600/home8/drbrmr/rmrdata/AN/N18.fid

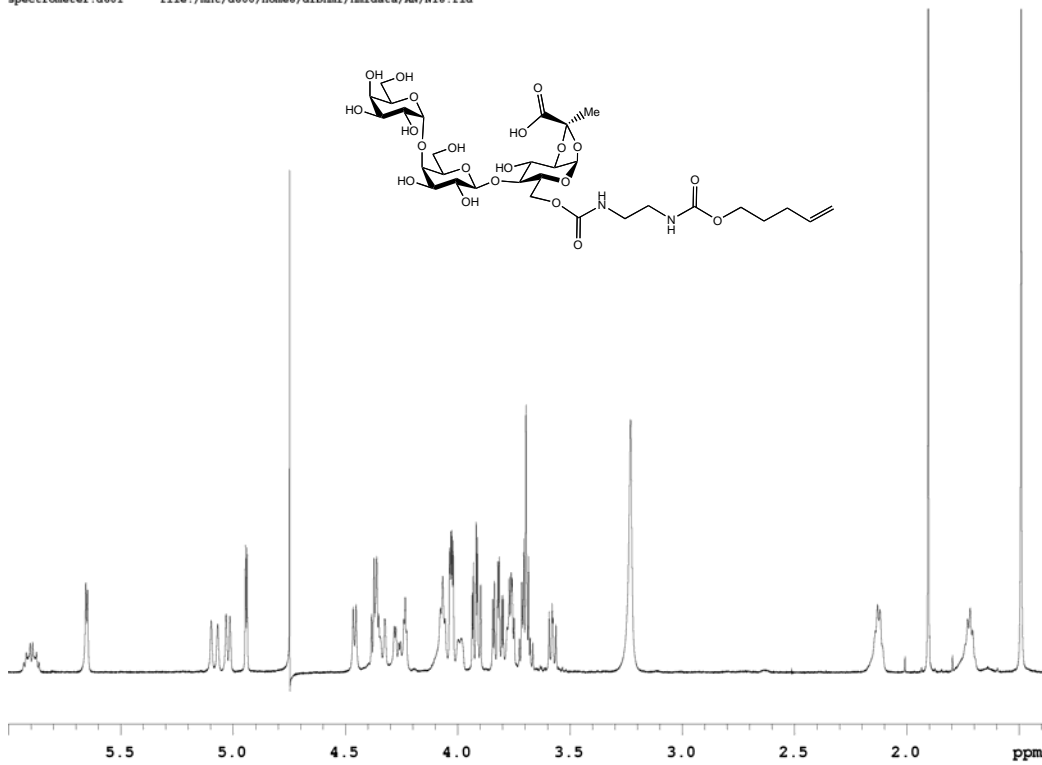

C & CH2 opposite side of CH & CH3  
date: Sep 20 2007 sweep width: 33784Hz acq.time: 2.0s relax.time: 0.1s # scans: 2736 dig.res.: 0.5 Hz/pt hz/mm:85.5  
spectrometer:d601 file:/mnt/d600/home8/drbrmr/rmrdata/AN/N18APT.fid

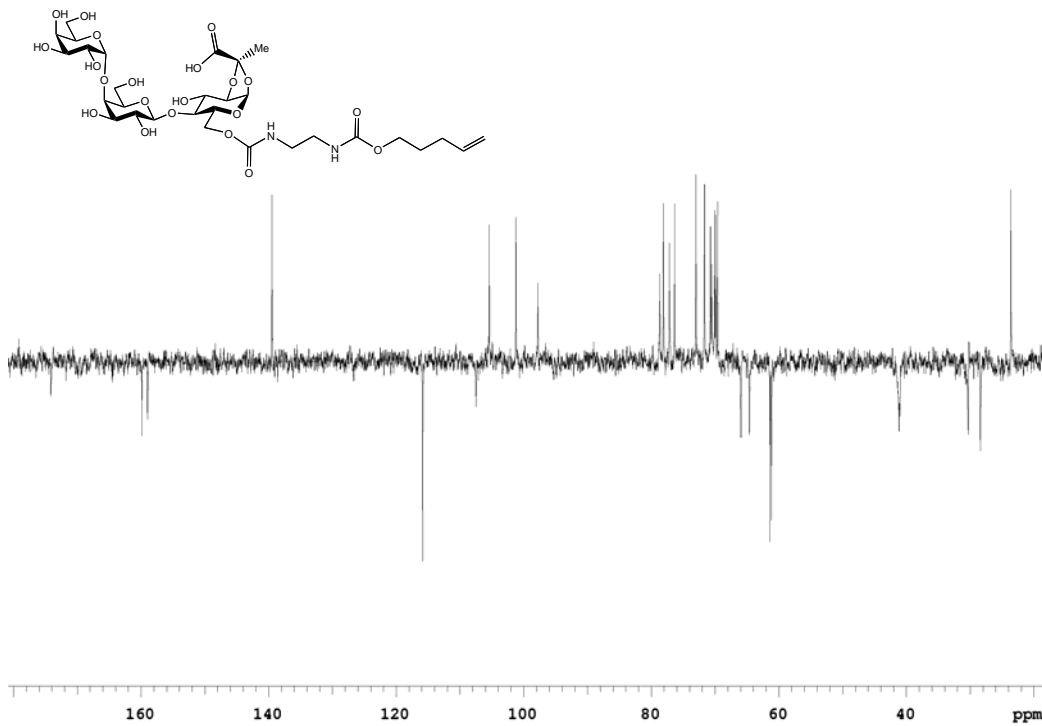

Supplement: 0804919105_Appendix.pdf [file 0804919105_Appendix.pdf]
